# Supplementary material for: Assessment of Novel Inhaler Technique Reminder Labels in Image Format on the Correct Demonstration of Inhaler Technique Skills in Asthma: A Single-Blinded Randomized Controlled Trial
Source: MDPI journal article supplement (doi:10.3390/ph14020150), 2021-02-12
Supplement: s1 [file s1]

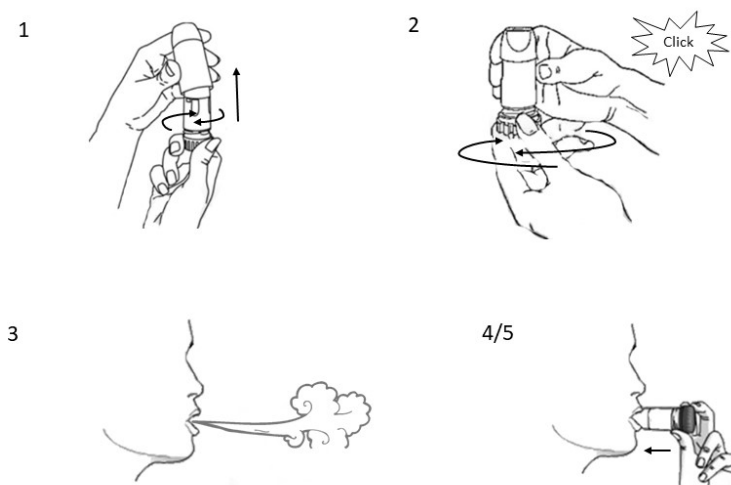

**Figure S1:** An example of inhaler (Turbuhaler, TH) technique label incorporating images attached to the patient's inhaler during the inhaler technique educational services.
